# Supplementary material for: A simple and effective fluorescent probe based on rhodamine B for determining Pd2+ions in aqueous solution
Source: Royal Society of Chemistry journal article supplement (doi:10.1039/c4ra12649a), 2014-12-05
Supplement: c4ra12649a1.pdf [file c4ra12649a1.pdf]

## Electronic Supplementary Information (ESI)

### A simple and effective fluorescent probe based on rhodamine B for determining Pd<sup>2+</sup> ions in aqueous solution

Jie Cui, Dong-Peng Li, Shi-Li Shen, Jin-Ting Liu\*, Bao-Xiang Zhao\*

#### 1. Part of optical spectroscopic data

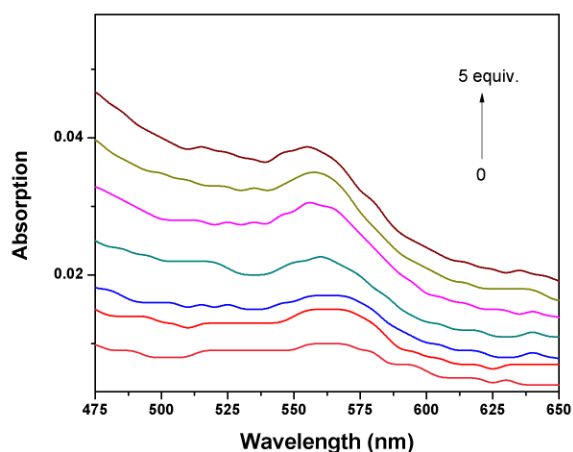

**Fig. S1** Absorption responses of **RL** (10 μM) toward different concentrations of PdCl<sub>2</sub> in EtOH:H<sub>2</sub>O (3:7 v/v) buffered with PBS (10 mM, pH = 7.2) solution.

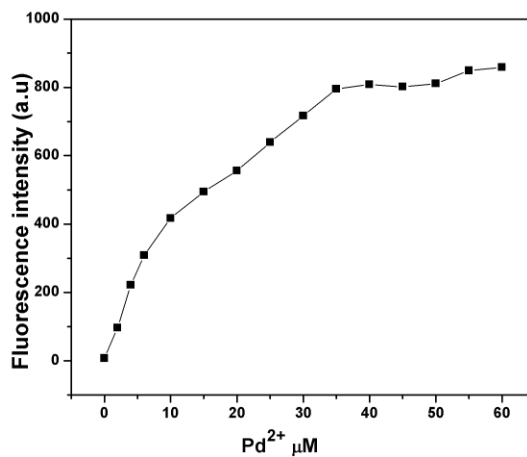

**Fig. S2** Changes in fluorescent intensities at 585 nm of **RL** (10 μM) in the presence of different concentrations of PdCl<sub>2</sub> (0 μM to 50 μM).

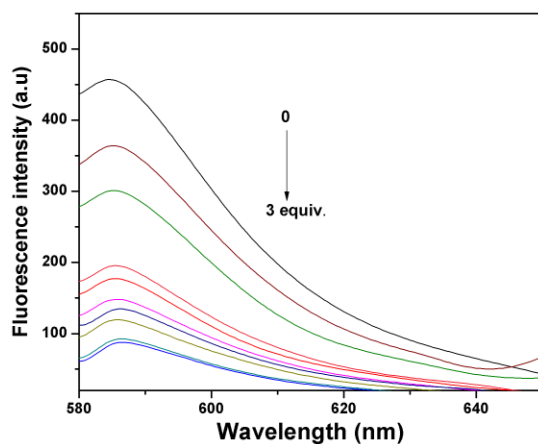

**Fig. S3** Fluorescence spectral changes of **RL** (10  $\mu\text{M}$ )/ $\text{Pd}^{2+}$  (20  $\mu\text{M}$ ) upon addition of  $\text{S}^{2-}$  (0  $\mu\text{M}$  to 30  $\mu\text{M}$ ) in EtOH/PBS (3:7, v/v, pH = 7.2).

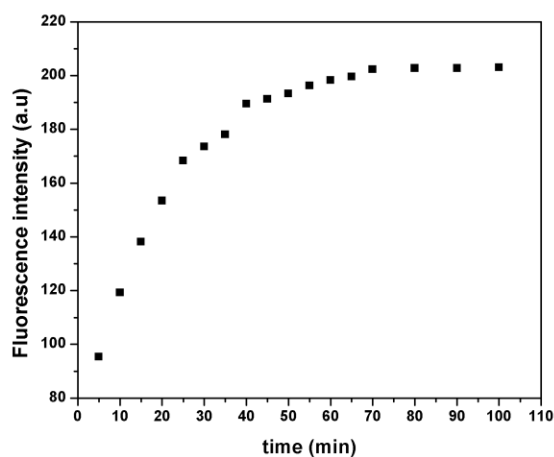

**Fig. S4** Time-dependent fluorescent intensities change of **RL** (10  $\mu\text{M}$ ) with  $\text{PdCl}_2$  (10  $\mu\text{M}$ ) in EtOH/PBS (3:7, v/v, pH = 7.2) at room temperature.

## 2. Summary of fluorescent probes for palladium

**Table. S1** Summary of fluorescent probes for palladium.

| Reference in the Main Manuscript | Structure of the Main Probe                                                         | Detection Limit | Selectivity      | Response Time |
|----------------------------------|-------------------------------------------------------------------------------------|-----------------|------------------|---------------|
| This Work                        | 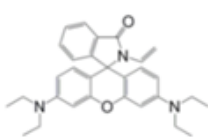 | 21.3 nM         | highly selective | 60 min        |

|     |                                                                                     |         |                       |               |
|-----|-------------------------------------------------------------------------------------|---------|-----------------------|---------------|
| 13g | 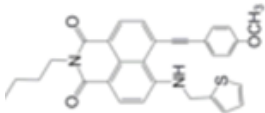   | 200 nM  | highly selective      | 1 min         |
| 15a |    | —       | better selective      | not mentioned |
| 16a |    | 30 nM   | better selective      | 3 h           |
| 16b |    | 70 nM   | highly selective      | 80 min        |
| 16c |   | 6.1 nM  | highly selective      | not mentioned |
| 16d |  | 3.78 nM | excellent selectivity | 1 h           |
| 16e |  | 87 nM   | highly selective      | 3 h           |
| 16f |  | 340 nM  | highly selective      | not mentioned |
| 16g |  | 2.83 nM | excellent selectivity | 900 s         |
| 16h |  | 40 nM   | highly selective      | 3 h           |

|     |                                                                                     |         |                  |         |
|-----|-------------------------------------------------------------------------------------|---------|------------------|---------|
| 18a | 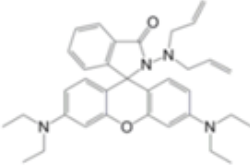   | 185 nM  | better selective | 300 min |
| 18b |    | 180 nM  | better selective | 60 min  |
| 18b |    | 1700 nM | better selective | 60 min  |
| 18c |    | 5 nM    | highly selective | 5 s     |
| 18d |   | 45.9 nM | highly selective | 10 min  |
| 18e |  | 73.8 nM | highly selective | 10 min  |

### 3. NMR Data

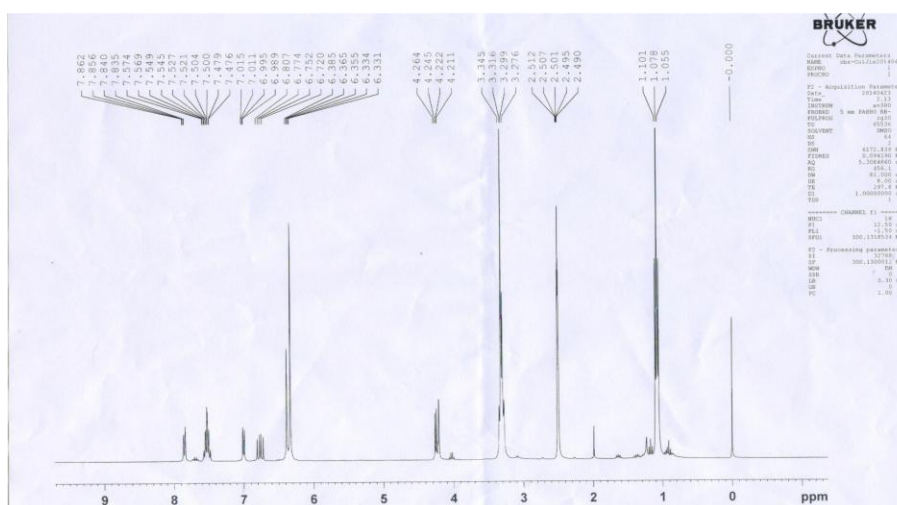

Fig. S5 <sup>1</sup>H NMR of 18L

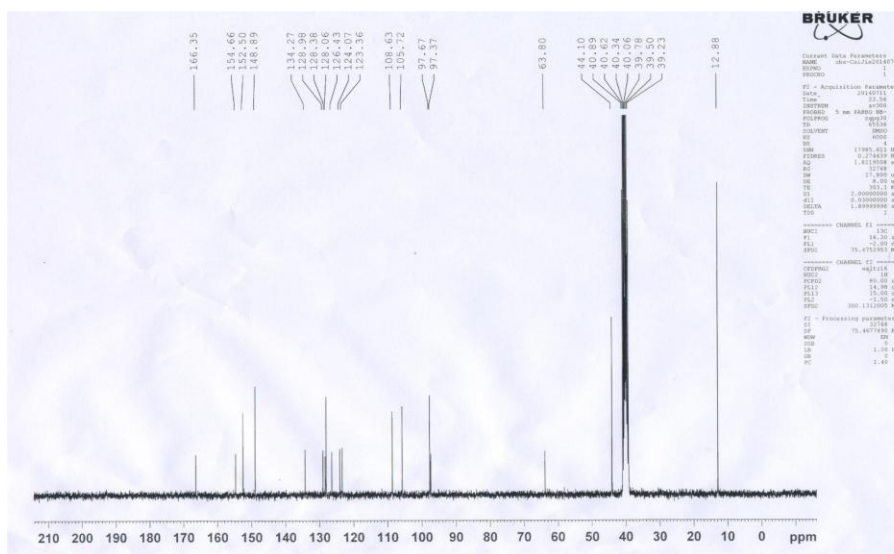

Fig. S6 <sup>13</sup>CNMR of RL

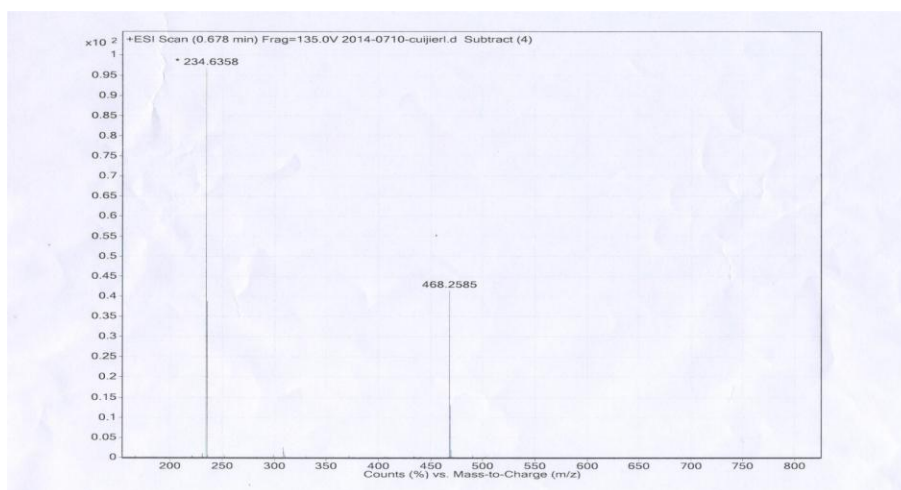

Fig. S7 TOF-HRMS of RL

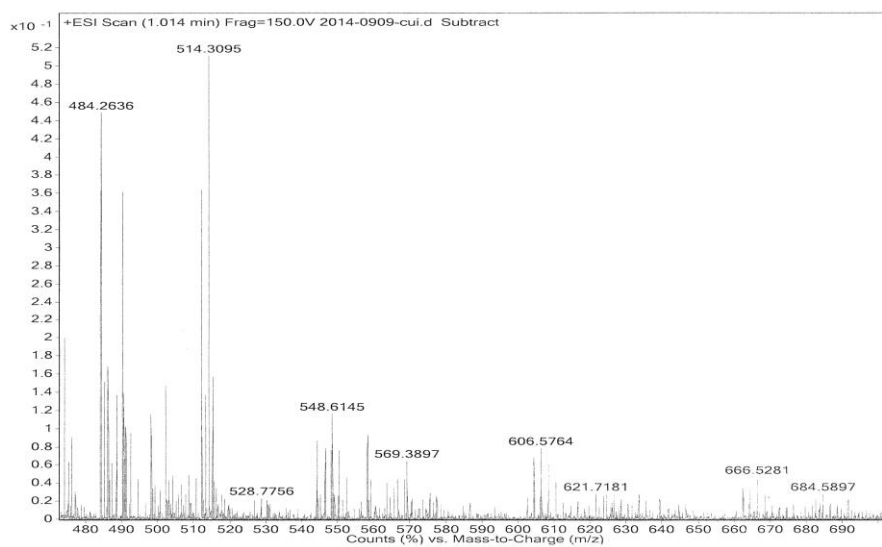

**Fig. S8** TOF-HRMS of  $\text{RL}+\text{Pd}^{2+}$
